# Supplementary material for: Impact of Rapid pH Changes on Activated Sludge Process
Source: MDPI journal article supplement (doi:10.3390/app12115754), 2022-06-06
Supplement: s1 [file s1]

| Parameters                      | Low pH reactor (pH6.5) |        |        |        |        |
|---------------------------------|------------------------|--------|--------|--------|--------|
| Time                            | Acclimatization cycle  | 0 h    | 24 h   | 48 h   | 72 h   |
| pH                              | 7.36                   | 7.00   | 6.26   | 6.28   | 6.46   |
| EC, $\mu\text{S/cm}$            | 1138                   | 1232   | 1370   | 1356   | 1346   |
| Temperature, $^{\circ}\text{C}$ | 21.8                   | 21.8   | 22.1   | 19.6   | 22.7   |
| TN, mg/l                        | 38                     | 41     | 41     | 45     | 40     |
| NH4-N, mg/l                     | 1.44                   | 1.36   | 7.35   | 9.35   | 10.50  |
| NO3-N, mg/l                     | 26.27                  | 27.35  | 26.53  | 22.07  | 18.98  |
| NO2-N, mg/l                     | 2.067                  | 0.176  | 0.156  | 0.158  | 0.957  |
| TP, mg/l                        | 10.06                  | 12.52  | 16.86  | 25.06  | 21.32  |
| PO4, mg/l                       | 4.70                   | 5.12   | 13.14  | 17.64  | 18.50  |
| COD, mg/l                       | 93                     | 130    | 137    | 170    | 80     |
| TOC, mg/l                       | 17.62                  | 15.62  | 18.51  | 20.69  | 20.97  |
| IC, mg/l                        | 20.53                  | 6.12   | 1.51   | 2.05   | 3.04   |
| TC, mg/l                        | 38.15                  | 21.75  | 20.01  | 22.73  | 24.01  |
| SVI30, ml/g                     | 87.78                  | 81.73  | 94.15  | 100.32 | 107.25 |
| SDI30, g/ml                     | 1.14                   | 1.22   | 1.06   | 1.03   | 0.99   |
| SVI5, ml/g                      | 221.46                 | 209.67 | 224.61 | 256.75 | 230.01 |
| DO, mg/l                        | 7.66                   | 7.95   | 8.30   | 8.43   | 8.27   |

| Parameters                      | High pH reactor (pH8.5) |        |        |        |        |
|---------------------------------|-------------------------|--------|--------|--------|--------|
| Time                            | Acclimatization cycle   | 0 h    | 24 h   | 48 h   | 72 h   |
| pH                              | 7.50                    | 7.77   | 8.00   | 7.98   | 7.97   |
| EC, $\mu\text{S/cm}$            | 1144                    | 1212   | 1308   | 1309   | 1322   |
| Temperature, $^{\circ}\text{C}$ | 22.0                    | 21.9   | 22.2   | 19.4   | 22.7   |
| TN, mg/l                        | 40                      | 39     | 41     | 43     | 45     |
| NH4-N, mg/l                     | 1.92                    | 0.85   | 0.60   | 0.60   | 0.66   |
| NO3-N, mg/l                     | 28.97                   | 26.20  | 31.73  | 23.13  | 25.03  |
| NO2-N, mg/l                     | 2.198                   | 0.075  | 0.052  | 0.045  | 0.077  |
| TP, mg/l                        | 7                       | 6.06   | 8.24   | 11.34  | 15.62  |
| PO4, mg/l                       | 3.1                     | 3.12   | 5.92   | 9.48   | 13.6   |
| COD, mg/l                       | 80                      | 68     | 60     | 58     | 60     |
| TOC, mg/l                       | 16.26                   | 15.08  | 15.42  | 15.14  | 15.09  |
| IC, mg/l                        | 21.22                   | 26.75  | 35.12  | 35.83  | 36.52  |
| TC, mg/l                        | 37.48                   | 41.83  | 50.54  | 50.97  | 51.61  |
| SVI30, ml/g                     | 90.09                   | 85.18  | 88.35  | 88.42  | 90.15  |
| SDI30, g/ml                     | 1.11                    | 1.18   | 1.14   | 1.14   | 1.12   |
| SVI5, ml/g                      | 226.92                  | 237.07 | 235.29 | 245.77 | 214.71 |
| DO, mg/l                        | 7.75                    | 8.21   | 8.43   | 8.37   | 8.46   |

| Significant         | t-test pH    |          |
|---------------------|--------------|----------|
|                     | R1           | R2       |
| Mean                | 6.67266667   | 7.844667 |
| Variance            | 0.238207778  | 0.045842 |
| Observations        | 5            | 5        |
| Hypothesized Mean   | 0            |          |
| df                  | 5            |          |
| t Stat              | -4.917169929 |          |
| P(T<=t) one-tail    | 0.002204149  |          |
| t Critical one-tail | 2.015048373  |          |
| P(T<=t) two-tail    | 0.004408298  |          |
| t Critical two-tail | 2.570581836  |          |

| not significant     | t-test TP   |          |
|---------------------|-------------|----------|
|                     | R1          | R2       |
| Mean                | 17.164      | 9.652    |
| Variance            | 37.93628    | 15.09892 |
| Observations        | 5           | 5        |
| Hypothesized Mean   | 0           |          |
| df                  | 7           |          |
| t Stat              | 2.306526645 |          |
| P(T<=t) one-tail    | 0.027232396 |          |
| t Critical one-tail | 1.894578605 |          |
| P(T<=t) two-tail    | 0.054464793 |          |
| t Critical two-tail | 2.364624252 |          |

| not significant     | t-test SVI30 |          |
|---------------------|--------------|----------|
|                     | R1           | R2       |
| Mean                | 94.24436455  | 88.43738 |
| Variance            | 101.134729   | 4.074907 |
| Observations        | 5            | 5        |
| Hypothesized Mean   | 0            |          |
| df                  | 4            |          |
| t Stat              | 1.265924657  |          |
| P(T<=t) one-tail    | 0.13712451   |          |
| t Critical one-tail | 2.131846786  |          |
| P(T<=t) two-tail    | 0.27424902   |          |
| t Critical two-tail | 2.776445105  |          |

| not significant   | t-test EC |          |
|-------------------|-----------|----------|
|                   | R1        | R2       |
| Mean              | 1288.267  | 1259     |
| Variance          | 10119.69  | 6103.556 |
| Observations      | 5         | 5        |
| Hypothesized Mean | 0         |          |
| df                | 8         |          |
| t Stat            | 0.513794  |          |
| P(T<=t) on        | 0.310641  |          |
| t Critical on     | 1.859548  |          |
| P(T<=t) tw        | 0.621282  |          |
| t Critical tw     | 2.306004  |          |

| not significant   | t-test PO4 |          |
|-------------------|------------|----------|
|                   | R1         | R2       |
| Mean              | 11.82      | 7.044    |
| Variance          | 43.9554    | 20.28288 |
| Observations      | 5          | 5        |
| Hypothesized Mean | 0          |          |
| df                | 7          |          |
| t Stat            | 1.332454   |          |
| P(T<=t) on        | 0.112225   |          |
| t Critical on     | 1.894579   |          |
| P(T<=t) tw        | 0.224449   |          |
| t Critical tw     | 2.364624   |          |

| not significant   | t-test SVI30 |          |
|-------------------|--------------|----------|
|                   | R1           | R2       |
| Mean              | 228.5012     | 231.9513 |
| Variance          | 304.8912     | 137.7344 |
| Observations      | 5            | 5        |
| Hypothesized Mean | 0            |          |
| df                | 7            |          |
| t Stat            | -0.36669     |          |
| P(T<=t) on        | 0.362342     |          |
| t Critical on     | 1.894579     |          |
| P(T<=t) tw        | 0.724684     |          |
| t Critical tw     | 2.364624     |          |

| not significant     | t-test NH4 |          |
|---------------------|------------|----------|
|                     | R1         | R2       |
| Mean                | 6.000667   | 0.926667 |
| Variance            | 18.9068    | 0.316961 |
| Observations        | 5          | 5        |
| Hypothesized Mean   | 0          |          |
| df                  | 4          |          |
| t Stat              | 2.587714   |          |
| P(T<=t) one-tail    | 0.030415   |          |
| t Critical one-tail | 2.131847   |          |
| P(T<=t) two-tail    | 0.06083    |          |
| t Critical two-tail | 2.776445   |          |

| Significant         | t-test COD |          |
|---------------------|------------|----------|
|                     | R1         | R2       |
| Mean                | 121.9      | 65.13333 |
| Variance            | 1306.8     | 85.47778 |
| Observations        | 5          | 5        |
| Hypothesized Mean   | 0          |          |
| df                  | 5          |          |
| t Stat              | 3.401852   |          |
| P(T<=t) one-tail    | 0.009606   |          |
| t Critical one-tail | 2.015048   |          |
| P(T<=t) two-tail    | 0.019212   |          |
| t Critical two-tail | 2.570582   |          |

| not significant     | t-test TN  |            |
|---------------------|------------|------------|
|                     | Variable 1 | Variable 2 |
| Mean                | 41.13333   | 41.53333   |
| Variance            | 6.033333   | 5.811111   |
| Observations        | 5          | 5          |
| Hypothesized Mean   | 0          |            |
| df                  | 8          |            |
| t Stat              | -0.25989   |            |
| P(T<=t) one-tail    | 0.400756   |            |
| t Critical one-tail | 1.859548   |            |
| P(T<=t) two-tail    | 0.801513   |            |
| t Critical two-tail | 2.306004   |            |

| not significant   | t-test NO3 |          |
|-------------------|------------|----------|
|                   | R1         | R2       |
| Mean              | 24.24      | 27.01333 |
| Variance          | 12.84869   | 11.43256 |
| Observations      | 5          | 5        |
| Hypothesized Mean | 0          |          |
| df                | 8          |          |
| t Stat            | -1.2585    |          |
| P(T<=t) on        | 0.121848   |          |
| t Critical on     | 1.859548   |          |
| P(T<=t) tw        | 0.243697   |          |
| t Critical tw     | 2.306004   |          |

| Significant       | t-test TOC |          |
|-------------------|------------|----------|
|                   | R1         | R2       |
| Mean              | 18.68133   | 15.39867 |
| Variance          | 4.945873   | 0.251188 |
| Observations      | 5          | 5        |
| Hypothesized Mean | 0          |          |
| df                | 4          |          |
| t Stat            | 3.21983    |          |
| P(T<=t) on        | 0.016143   |          |
| t Critical on     | 2.131847   |          |
| P(T<=t) tw        | 0.032286   |          |
| t Critical tw     | 2.776445   |          |

| not significant   | t-test NO2 |          |
|-------------------|------------|----------|
|                   | R1         | R2       |
| Mean              | 0.702733   | 0.489267 |
| Variance          | 0.699516   | 0.912265 |
| Observations      | 5          | 5        |
| Hypothesized Mean | 0          |          |
| df                | 8          |          |
| t Stat            | 0.375978   |          |
| P(T<=t) on        | 0.358354   |          |
| t Critical on     | 1.859548   |          |
| P(T<=t) tw        | 0.716708   |          |
| t Critical tw     | 2.306004   |          |

| Significant       | t-test IC |          |
|-------------------|-----------|----------|
|                   | R1        | R2       |
| Mean              | 6.649333  | 31.08833 |
| Variance          | 63.41586  | 46.13919 |
| Observations      | 5         | 5        |
| Hypothesized Mean | 0         |          |
| df                | 8         |          |
| t Stat            | -5.22098  |          |
| P(T<=t) on        | 0.000401  |          |
| t Critical on     | 1.859548  |          |
| P(T<=t) tw        | 0.000802  |          |
| t Critical tw     | 2.306004  |          |
