# Supplementary material for: Impact of Rapid pH Changes on Activated Sludge Process
Source: MDPI journal article supplement (doi:10.3390/app12115754), 2022-06-06
Supplement: s1 [file s1]

Two identical open-type, custom made lab-scale SBR (6 cm in diameter and 50 cm high with the effluent drainage height of 47 cm) with a working volume of 1.33 L each were used in this study (Figure S6).

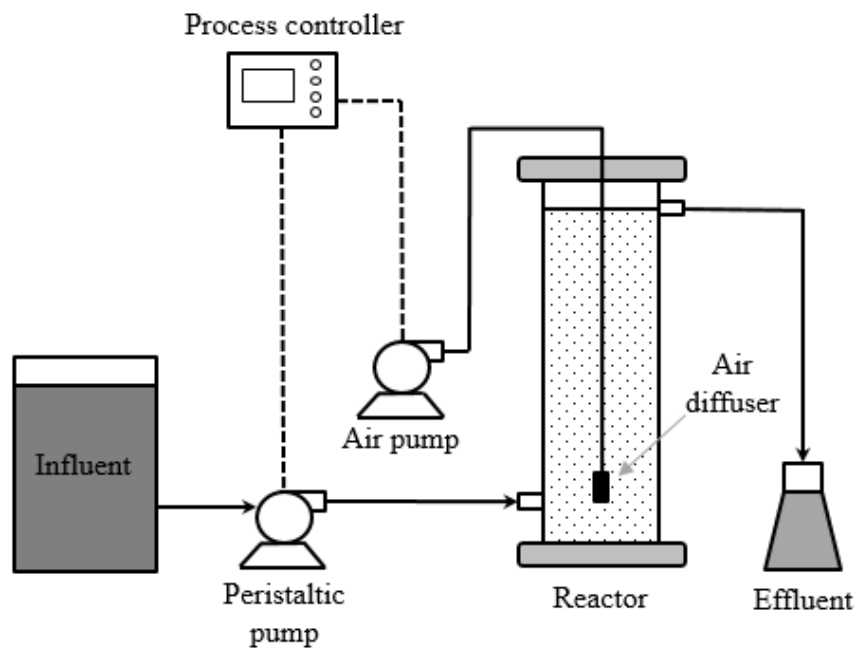

Figure S6: The schematic diagram of the experimental set-up [14]
