# Supplementary material for: Impact of Rapid pH Changes on Activated Sludge Process
Source: MDPI journal article supplement (doi:10.3390/app12115754), 2022-06-06
Supplement: s1 [file s1]

| Parameters                      | Low pH reactor (pH6.5) |        |        |        |        |
|---------------------------------|------------------------|--------|--------|--------|--------|
| Time                            | Acclimation cycle      | 0 h    | 24 h   | 48 h   | 72 h   |
| pH                              | 7.36                   | 7.00   | 6.26   | 6.28   | 6.46   |
| EC, $\mu\text{S}/\text{cm}$     | 1138                   | 1232   | 1370   | 1356   | 1346   |
| Temperature, $^{\circ}\text{C}$ | 21.8                   | 21.8   | 22.1   | 19.6   | 22.7   |
| TN, mg/l                        | 38                     | 41     | 41     | 45     | 40     |
| NH <sub>4</sub> -N, mg/l        | 1.44                   | 1.36   | 7.35   | 9.35   | 10.50  |
| NO <sub>3</sub> -N, mg/l        | 26.27                  | 27.35  | 26.53  | 22.07  | 18.98  |
| NO <sub>2</sub> -N, mg/l        | 2.067                  | 0.176  | 0.156  | 0.158  | 0.957  |
| TP, mg/l                        | 10.06                  | 12.52  | 16.86  | 25.06  | 21.32  |
| PO <sub>4</sub> , mg/l          | 4.70                   | 5.12   | 13.14  | 17.64  | 18.50  |
| COD, mg/l                       | 93                     | 130    | 137    | 170    | 80     |
| TOC, mg/l                       | 17.62                  | 15.62  | 18.51  | 20.69  | 20.97  |
| IC, mg/l                        | 20.53                  | 6.12   | 1.51   | 2.05   | 3.04   |
| TC, mg/l                        | 38.15                  | 21.75  | 20.01  | 22.73  | 24.01  |
| SVI <sub>30</sub> , ml/g        | 87.78                  | 81.73  | 94.15  | 100.32 | 107.25 |
| SDI <sub>30</sub> , g/ml        | 1.14                   | 1.22   | 1.06   | 1.03   | 0.99   |
| SVI <sub>5</sub> , ml/g         | 221.46                 | 209.67 | 224.61 | 256.75 | 230.01 |
| DO, mg/l                        | 7.66                   | 7.95   | 8.30   | 8.43   | 8.27   |

| Parameters                      | High pH reactor (pH8.5) |        |        |        |        |
|---------------------------------|-------------------------|--------|--------|--------|--------|
| Time                            | Acclimation cycle       | 0 h    | 24 h   | 48 h   | 72 h   |
| pH                              | 7.50                    | 7.77   | 8.00   | 7.98   | 7.97   |
| EC, $\mu\text{S}/\text{cm}$     | 1144                    | 1212   | 1308   | 1309   | 1322   |
| Temperature, $^{\circ}\text{C}$ | 22.0                    | 21.9   | 22.2   | 19.4   | 22.7   |
| TN, mg/l                        | 40                      | 39     | 41     | 43     | 45     |
| NH <sub>4</sub> -N, mg/l        | 1.92                    | 0.85   | 0.60   | 0.60   | 0.66   |
| NO <sub>3</sub> -N, mg/l        | 28.97                   | 26.20  | 31.73  | 23.13  | 25.03  |
| NO <sub>2</sub> -N, mg/l        | 2.198                   | 0.075  | 0.052  | 0.045  | 0.077  |
| TP, mg/l                        | 7                       | 6.06   | 8.24   | 11.34  | 15.62  |
| PO <sub>4</sub> , mg/l          | 3.1                     | 3.12   | 5.92   | 9.48   | 13.6   |
| COD, mg/l                       | 80                      | 68     | 60     | 58     | 60     |
| TOC, mg/l                       | 16.26                   | 15.08  | 15.42  | 15.14  | 15.09  |
| IC, mg/l                        | 21.22                   | 26.75  | 35.12  | 35.83  | 36.52  |
| TC, mg/l                        | 37.48                   | 41.83  | 50.54  | 50.97  | 51.61  |
| SVI <sub>30</sub> , ml/g        | 90.09                   | 85.18  | 88.35  | 88.42  | 90.15  |
| SDI <sub>30</sub> , g/ml        | 1.11                    | 1.18   | 1.14   | 1.14   | 1.12   |
| SVI <sub>5</sub> , ml/g         | 226.92                  | 237.07 | 235.29 | 245.77 | 214.71 |
| DO, mg/l                        | 7.75                    | 8.21   | 8.43   | 8.37   | 8.46   |

| Parameters                      | t.test | significance |
|---------------------------------|--------|--------------|
| pH                              | 0.002  | yes          |
| EC, $\mu\text{S}/\text{cm}$     | 0.311  | no           |
| Temperature, $^{\circ}\text{C}$ | 0.483  | no           |
| TN, mg/l                        | 0.401  | no           |
| NH <sub>4</sub> -N, mg/l        | 0.029  | yes          |
| NO <sub>3</sub> -N, mg/l        | 0.122  | no           |
| NO <sub>2</sub> -N, mg/l        | 0.358  | no           |
| TP, mg/l                        | 0.028  | yes          |
| PO <sub>4</sub> , mg/l          | 0.112  | no           |
| COD, mg/l                       | 0.011  | yes          |
| TOC, mg/l                       | 0.014  | yes          |
| IC, mg/l                        | 0.000  | yes          |
| TC, mg/l                        | 0.001  | yes          |
| SVI <sub>30</sub> , ml/g        | 0.135  | no           |
| SDI <sub>30</sub> , g/ml        | 0.167  | no           |
| SVI <sub>5</sub> , ml/g         | 0.362  | no           |
| DO, mg/l                        | 0.272  | no           |
