# Supplementary material for: Impact of Rapid pH Changes on Activated Sludge Process
Source: MDPI journal article supplement (doi:10.3390/app12115754), 2022-06-06
Supplement: s1 [file s1]

Archive with 8 entries (8 files):
- Figure S3.jpeg
- Figure S6.pdf
- FigureS1.jpeg
- FigureS2.jpeg
- FigureS4.jpeg
- FigureS5.jpeg
- Table S1.pdf
- Table S2.pdf
