# Supplementary figures and images for: Impact of Rapid pH Changes on Activated Sludge Process
Source: MDPI journal article supplement (doi:10.3390/app12115754), 2022-06-06

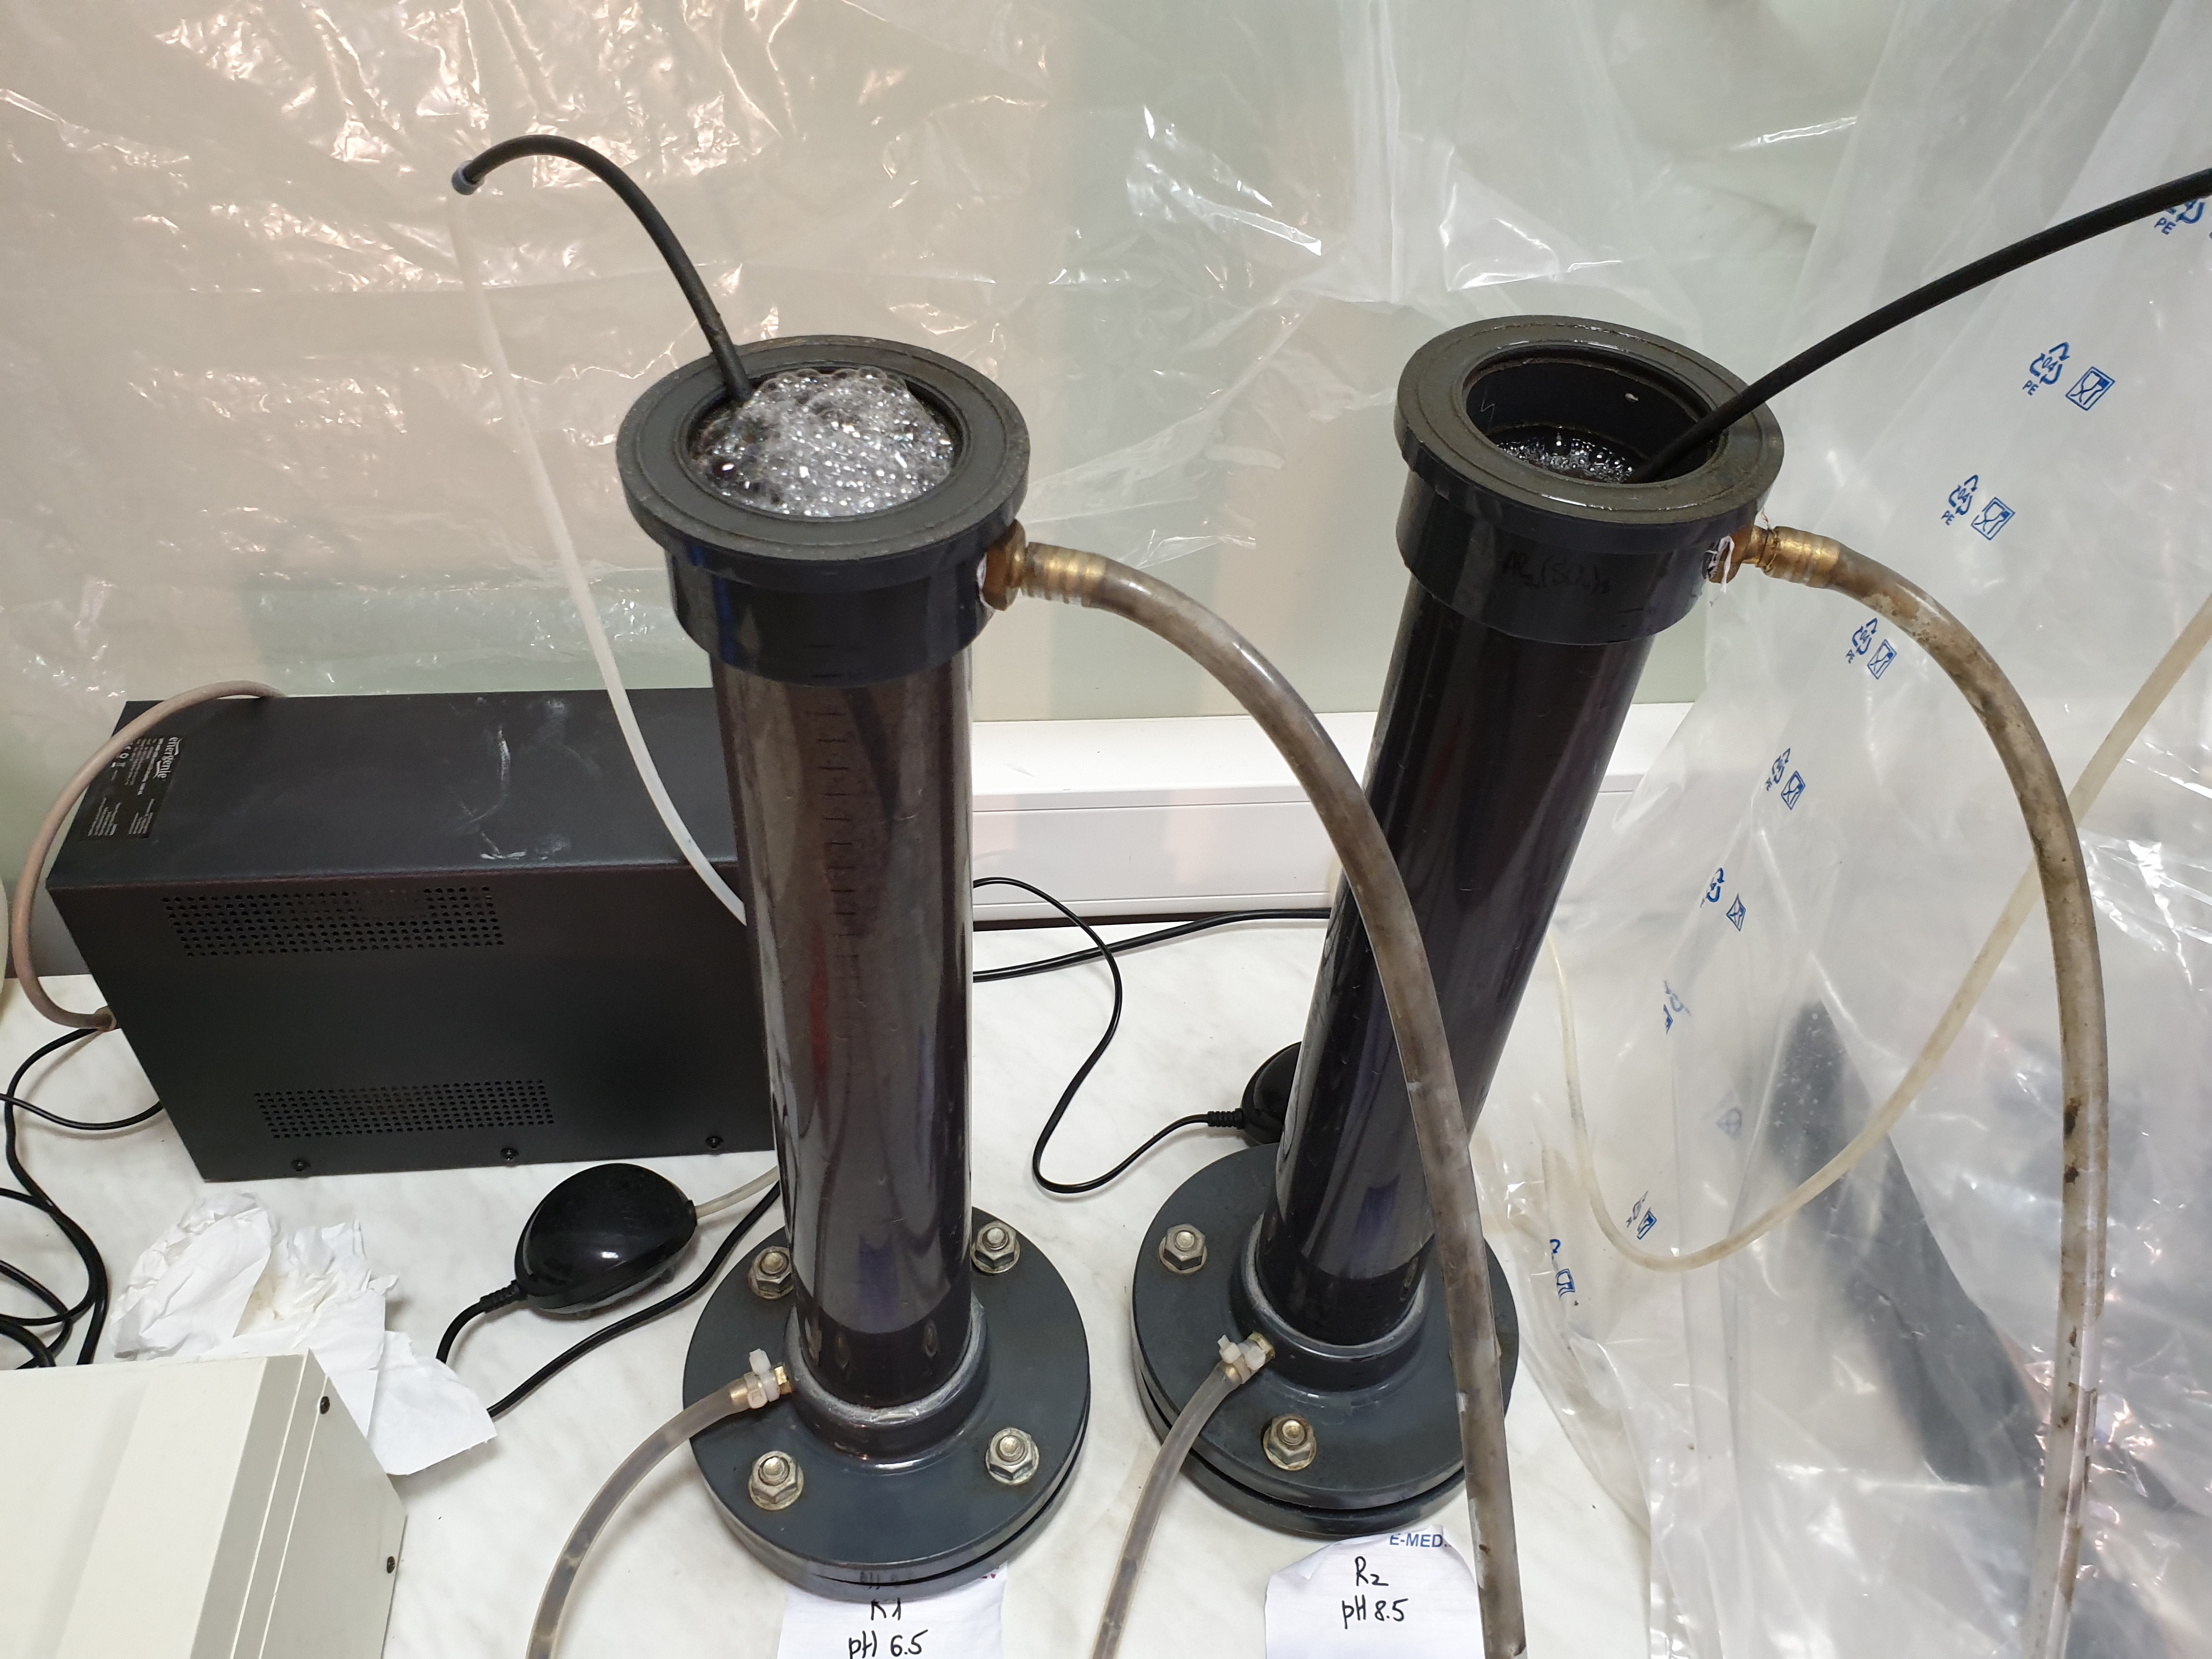

Supplement: s1 [file s1 › Figure S3.jpeg]

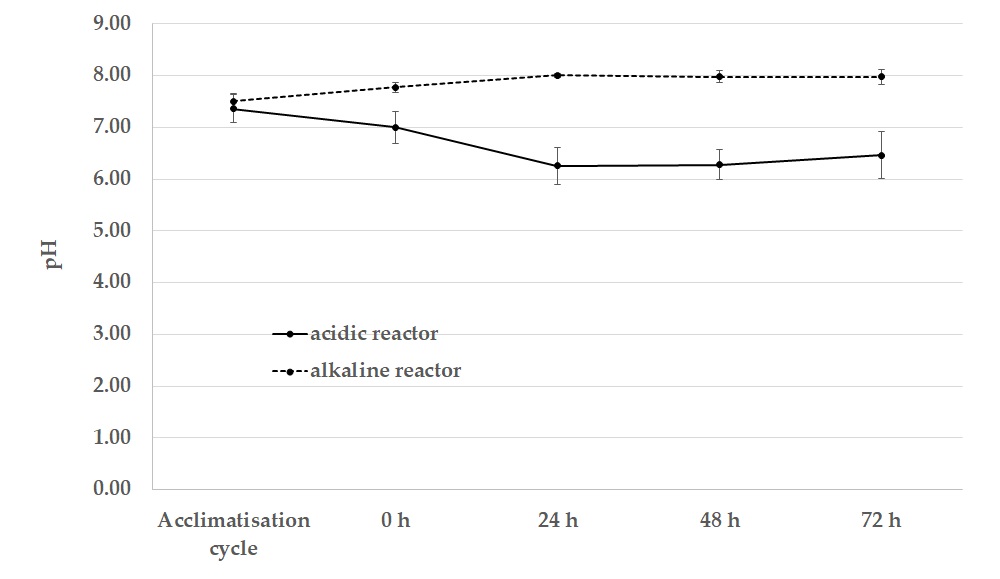

Supplement: s1 [file s1 › FigureS1.jpeg]

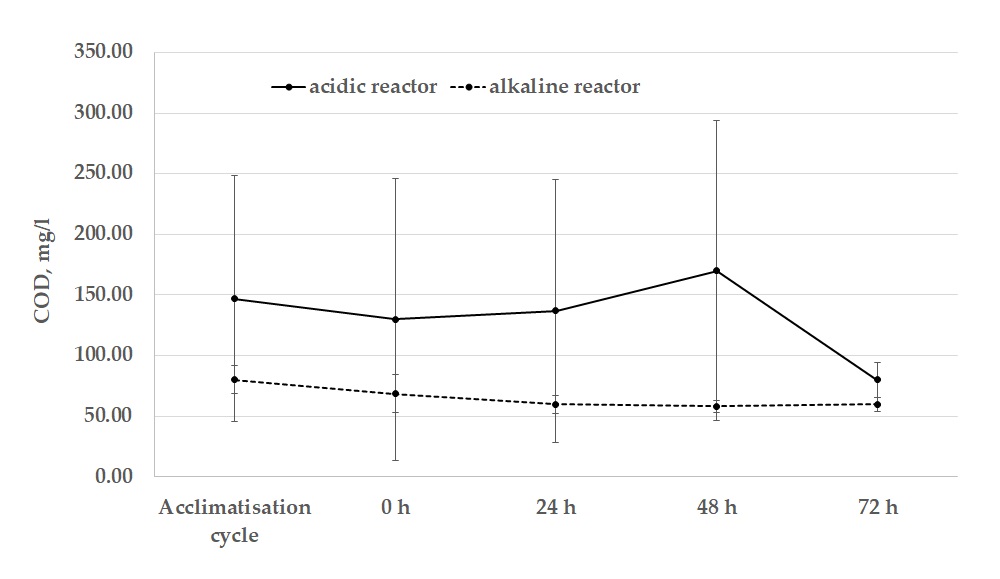

Supplement: s1 [file s1 › FigureS2.jpeg]

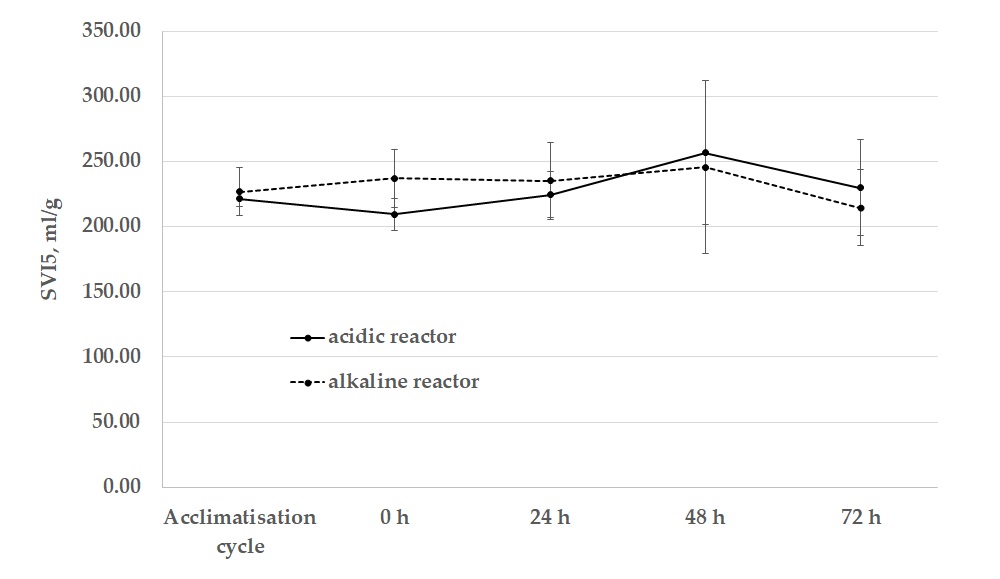

Supplement: s1 [file s1 › FigureS4.jpeg]

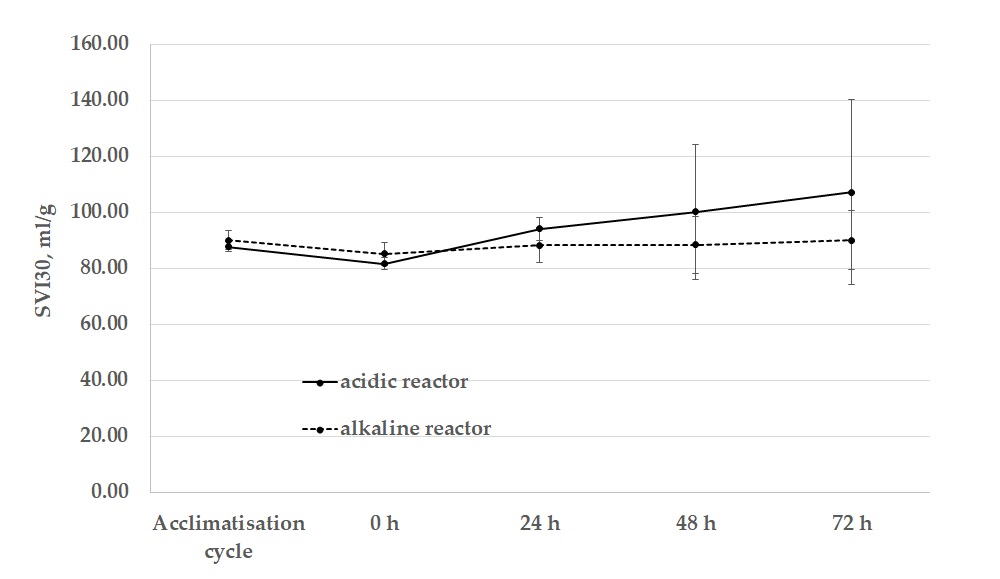

Supplement: s1 [file s1 › FigureS5.jpeg]
